# Supplementary material
Source: PubMed Central journal article supplement (PMC1965529)
Supplement: pnas_0704297104_1.pdf [file pnas_0704297104_1.pdf]

**Table 3. Effect of various nucleotides and Av2 variants on P-cluster maturation**

| Line        | Factors                         | Activity*                                                                          |                                      |                                                   |                                                  |               |
|-------------|---------------------------------|------------------------------------------------------------------------------------|--------------------------------------|---------------------------------------------------|--------------------------------------------------|---------------|
|             |                                 | C <sub>2</sub> H <sub>4</sub> formation<br>under C <sub>2</sub> H <sub>2</sub> /Ar | H <sub>2</sub> formation<br>under Ar | NH <sub>3</sub> formation<br>under N <sub>2</sub> | H <sub>2</sub> formation<br>under N <sub>2</sub> | Average,<br>% |
| Nucleotides |                                 |                                                                                    |                                      |                                                   |                                                  |               |
| 1           | No nucleotide                   | 520 ± 42 (51)                                                                      | 567 ± 16 (57)                        | 317 ± 52 (50)                                     | 113 ± 7 (51)                                     | 52            |
| 2           | ATP                             | 864 ± 33 (85)                                                                      | 888 ± 39 (89)                        | 582 ± 22 (92)                                     | 173 ± 7 (78)                                     | 86            |
| 3           | ADP <sup>†</sup>                | 505 ± 13 (50)                                                                      | 533 ± 14 (53)                        | 326 ± 59 (52)                                     | 104 ± 11 (47)                                    | 51            |
| 4           | AMPPNP <sup>†</sup>             | 496 ± 5 (49)                                                                       | 533 ± 6 (53)                         | 345 ± 21 (55)                                     | 106 ± 1 (48)                                     | 51            |
| 5           | ATP <sub>γ</sub> S <sup>†</sup> | 491 ± 37 (48)                                                                      | 509 ± 11 (51)                        | 313 ± 14 (49)                                     | 102 ± 4 (46)                                     | 49            |
| Av2         |                                 |                                                                                    |                                      |                                                   |                                                  |               |
| 6           | No Av2                          | 520 ± 8 (51)                                                                       | 550 ± 21 (55)                        | 325 ± 51 (51)                                     | 105 ± 1 (47)                                     | 51            |
| 7           | Av2 <sup>wt</sup>               | 864 ± 33 (85)                                                                      | 888 ± 39 (89)                        | 582 ± 22 (92)                                     | 173 ± 7 (78)                                     | 86            |
| 8           | Av2 <sup>M156C‡</sup>           | 572 ± 31 (56)                                                                      | 556 ± 14 (56)                        | 328 ± 23 (52)                                     | 103 ± 3 (47)                                     | 53            |
| 9           | Av2 <sup>E146D§</sup>           | 875 ± 22 (86)                                                                      | 837 ± 14 (84)                        | 509 ± 16 (80)                                     | 159 ± 15 (71)                                    | 80            |

Activities of C<sub>2</sub>H<sub>4</sub> formation under C<sub>2</sub>H<sub>2</sub>/Ar, H<sub>2</sub> formation under Ar, NH<sub>3</sub> formation under N<sub>2</sub>, and H<sub>2</sub> formation under N<sub>2</sub> are expressed as nmol per min per mg of protein. Percentages relative to Av1<sup>Δ*nifB*</sup> (Table 1, line1) are given in parentheses. Average activities are expressed as percentages only.

\*The lower detection limits were 0.01, 0.02, 0.001, and 0.02 nmol per min per mg of protein for C<sub>2</sub>H<sub>4</sub> formation under C<sub>2</sub>H<sub>2</sub>/Ar, H<sub>2</sub> formation under Ar, NH<sub>3</sub> formation under N<sub>2</sub>, and H<sub>2</sub> formation under N<sub>2</sub>, respectively.

<sup>†</sup>Note that, upon addition of excess MgATP in the subsequent activity assays, these nucleotides do not interfere with substrate reduction. Abbreviations: ATP<sub>γ</sub>S, adenosine 5'-O-(3-thiotriphosphate); AMPPNP, 5'-adenylylimidodiphosphate.

<sup>‡</sup>Unlike Av2<sup>wt</sup>, Av2<sup>M156C</sup> does not undergo MgATP-induced conformational change.

<sup>§</sup>Av2<sup>E146D</sup> is specifically defective in FeMoco assembly but fully active in MgATP hydrolysis.
