# Supplementary material
Source: PubMed Central journal article supplement (PMC1965529)
Supplement: pnas_0704297104_2.pdf [file pnas_0704297104_2.pdf]

**Table 4. Time-dependent P-cluster maturation**

| Line | Av1 <sup>†</sup>                | Activity*                                                                          |                                      |                                                   |                                                  |               |
|------|---------------------------------|------------------------------------------------------------------------------------|--------------------------------------|---------------------------------------------------|--------------------------------------------------|---------------|
|      |                                 | C <sub>2</sub> H <sub>4</sub> formation<br>under C <sub>2</sub> H <sub>2</sub> /Ar | H <sub>2</sub> formation<br>under Ar | NH <sub>3</sub> formation<br>under N <sub>2</sub> | H <sub>2</sub> formation<br>under N <sub>2</sub> | Average,<br>% |
| 1    | Av1 <sup>ΔnifB</sup>            | 1,014 ± 29 (100)                                                                   | 998 ± 31 (100)                       | 633 ± 6 (100)                                     | 223 ± 34 (100)                                   | 100           |
| 2    | Av1 <sup>ΔnifZΔnifB (0)</sup>   | 510 ± 16 (50)                                                                      | 493 ± 19 (49)                        | 326 ± 6 (52)                                      | 103 ± 3 (46)                                     | 49            |
| 3    | Av1 <sup>ΔnifZΔnifB (15')</sup> | 543 ± 32 (53)                                                                      | 504 ± 9 (51)                         | 301 ± 22 (48)                                     | 145 ± 28 (65)                                    | 54            |
| 4    | Av1 <sup>ΔnifZΔnifB (30')</sup> | 685 ± 20 (68)                                                                      | 610 ± 49 (61)                        | 383 ± 9 (61)                                      | 151 ± 19 (67)                                    | 64            |
| 5    | Av1 <sup>ΔnifZΔnifB (45')</sup> | 758 ± 27 (75)                                                                      | 914 ± 10 (92)                        | 452 ± 30 (71)                                     | 190 ± 14 (85)                                    | 81            |
| 6    | Av1 <sup>ΔnifZΔnifB (60')</sup> | 812 ± 74 (80)                                                                      | 883 ± 14 (88)                        | 509 ± 7 (80)                                      | 210 ± 11 (94)                                    | 86            |

Activities of C<sub>2</sub>H<sub>4</sub> formation under C<sub>2</sub>H<sub>2</sub>/Ar, H<sub>2</sub> formation under Ar, NH<sub>3</sub> formation under N<sub>2</sub>, and H<sub>2</sub> formation under N<sub>2</sub> are expressed as nmol per min per mg of protein. Percentages relative to Av1<sup>ΔnifB</sup> (line 1) are given in parentheses. Average activities are expressed as percentages only.

\*The lower detection limits were 0.01, 0.02, 0.001, and 0.02 nmol per min per mg of protein for C<sub>2</sub>H<sub>4</sub> formation under C<sub>2</sub>H<sub>2</sub>/Ar, H<sub>2</sub> formation under Ar, NH<sub>3</sub> formation under N<sub>2</sub>, and H<sub>2</sub> formation under N<sub>2</sub>, respectively.

<sup>†</sup>Av1 proteins (lines 2-6) are categorically designated Av1<sup>ΔnifZΔnifB (varied time)</sup> (Table 1).
