# Supplementary material
Source: PubMed Central journal article supplement (PMC1965529)
Supplement: pnas_0704297104_3.pdf [file pnas_0704297104_3.pdf]

**Table 5. Determination of the sequence of events in P-cluster maturation**

| Line | Assay components                     |      |                   |                |        | Activity*                                                                          |                                      |                                                   |                                                  |               |
|------|--------------------------------------|------|-------------------|----------------|--------|------------------------------------------------------------------------------------|--------------------------------------|---------------------------------------------------|--------------------------------------------------|---------------|
|      | Av1 <sup>†</sup>                     | NifZ | Av2 <sup>wt</sup> | ATP            | FeMoco | C <sub>2</sub> H <sub>4</sub> formation<br>under C <sub>2</sub> H <sub>2</sub> /Ar | H <sub>2</sub> formation<br>under Ar | NH <sub>3</sub> formation<br>under N <sub>2</sub> | H <sub>2</sub> formation<br>under N <sub>2</sub> | Average,<br>% |
| 1    | Av1 <sup>ΔnifB</sup>                 | –    | –                 | –              | +      | 1,014 ± 29 (100)                                                                   | 998 ± 31 (100)                       | 633 ± 6 (100)                                     | 223 ± 34 (100)                                   | 100           |
| 2    | Av1 <sup>ΔnifZΔnifB (+Av2/ATP)</sup> | –    | –                 | –              | +      | 491 ± 6 (48)                                                                       | 514 ± 15 (52)                        | 320 ± 6 (51)                                      | 100 ± 5 (45)                                     | 49            |
| 3    | Av1 <sup>ΔnifZΔnifB (+Av2/ATP)</sup> | +    | –                 | –              | +      | 470 ± 25 (46)                                                                      | 479 ± 20 (48)                        | 287 ± 2 (45)                                      | 106 ± 9 (48)                                     | 47            |
| 4    | Av1 <sup>ΔnifZΔnifB (+Av2/ATP)</sup> | +    | –                 | +              | +      | 466 ± 16 (46)                                                                      | 470 ± 15 (47)                        | 310 ± 22 (49)                                     | 112 ± 4 (50)                                     | 48            |
| 5    | Av1 <sup>ΔnifZΔnifB (+NifZ)</sup>    | –    | –                 | –              | +      | 518 ± 28 (51)                                                                      | 523 ± 66 (52)                        | 330 ± 32 (52)                                     | 106 ± 6 (48)                                     | 51            |
| 6    | Av1 <sup>ΔnifZΔnifB (+NifZ)</sup>    | –    | +                 | –              | +      | 479 ± 35 (47)                                                                      | 526 ± 10 (53)                        | 324 ± 12 (51)                                     | 94 ± 21 (42)                                     | 46            |
| 7    | Av1 <sup>ΔnifZΔnifB (+NifZ)</sup>    | –    | + <sup>‡</sup>    | + <sup>§</sup> | +      | 803 ± 17 (79)                                                                      | 772 ± 42 (77)                        | 585 ± 37 (92)                                     | 201 ± 10 (90)                                    | 85            |

Activities of C<sub>2</sub>H<sub>4</sub> formation under C<sub>2</sub>H<sub>2</sub>/Ar, H<sub>2</sub> formation under Ar, NH<sub>3</sub> formation under N<sub>2</sub>, and H<sub>2</sub> formation under N<sub>2</sub> are expressed as nmol per min per mg of protein. Percentages relative to Av1<sup>ΔnifB</sup> (line 1) are given in parentheses. Average activities are expressed as percentages only.

\*The lower detection limits were 0.01, 0.02, 0.001, and 0.02 nmol per min per mg of protein for C<sub>2</sub>H<sub>4</sub> formation under C<sub>2</sub>H<sub>2</sub>/Ar, H<sub>2</sub> formation under Ar, NH<sub>3</sub> formation under N<sub>2</sub>, and H<sub>2</sub> formation under N<sub>2</sub>, respectively

<sup>†</sup>Note that both Av1<sup>ΔnifZΔnifB (+Av2/ATP)</sup> and Av1<sup>ΔnifZΔnifB (+NifZ)</sup> can be activated in assays containing NifZ, Av2<sup>wt</sup>, and MgATP to an average substrate reduction activity of 82% and 87%, respectively.

<sup>‡</sup>No P-cluster formation was observed if Av2<sup>wt</sup> was replaced by Av2<sup>M156C</sup>; whereas Av2<sup>E146D</sup> was fully competent as a replacement for Av2<sup>wt</sup> in P-cluster formation. These results are consistent with those from Table 3 (lines 8-9).

<sup>§</sup>No P-cluster formation was observed if ATP was replaced by ADP, AMPPNP, or ATPγS. These results are consistent with those from Table 3 (lines 3-5).
